# Supplementary material
Source: Springer Nature journal article supplement (https://www.springermedizin.de/resource/supplementary/12905_2011_274_MOESM3_ESM.pdf/9518428)
Supplement: MOESM3 [file 9518428]

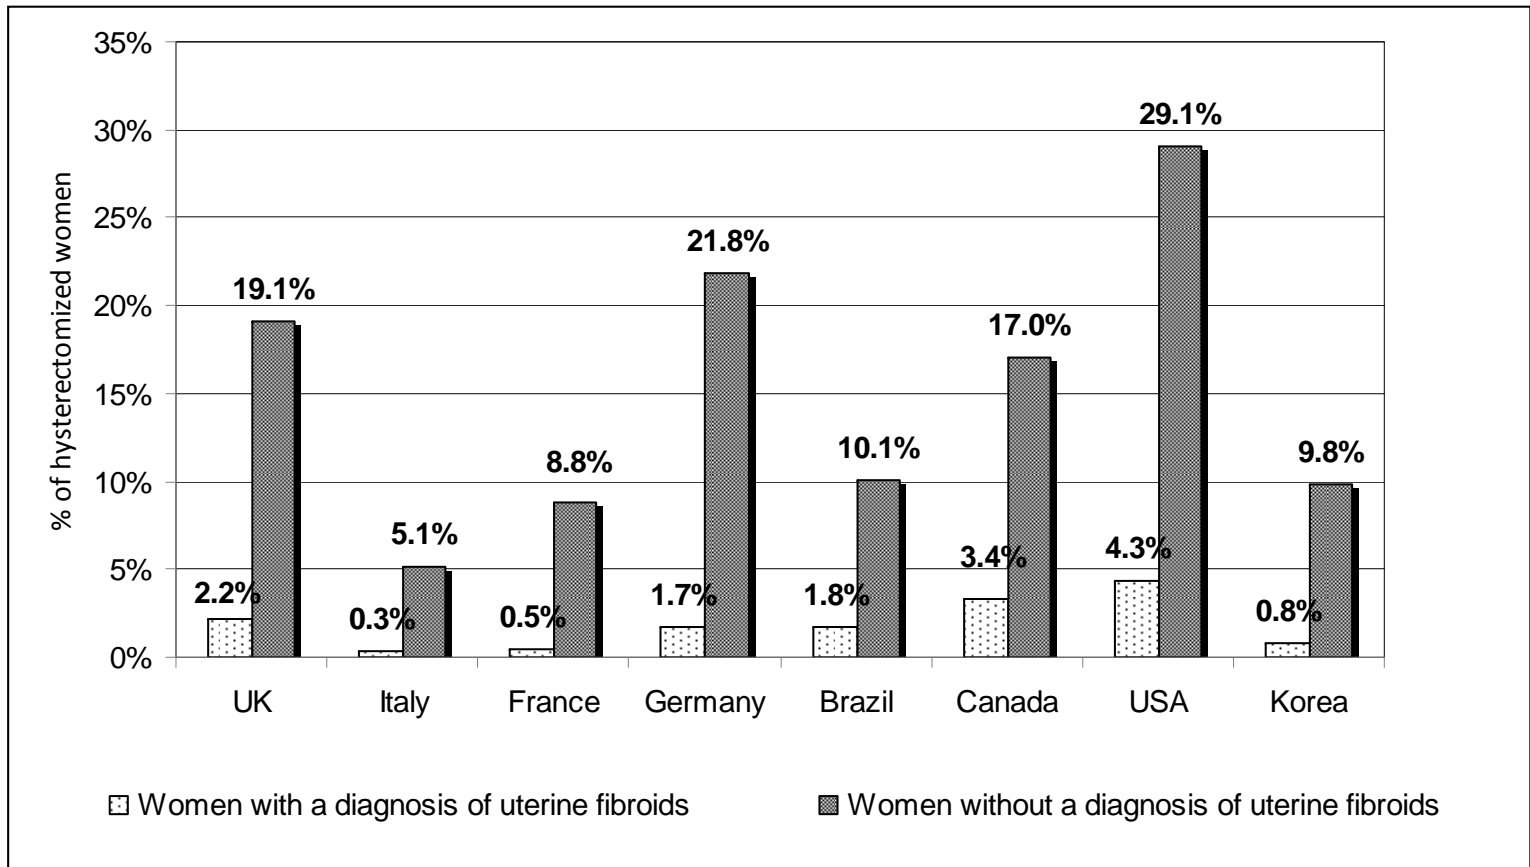

### 95% Confidence Intervall

| Women...                  | UK         | Italy     | France    | Germany    | Brazil     | Canada    | USA        | Korea     |
|---------------------------|------------|-----------|-----------|------------|------------|-----------|------------|-----------|
| with a diagnosis of Uf*   | 10.6-30.5% | 2.1-10.2% | 3.3-18.2% | 15.6-29.1% | 7.3%-13.5% | 7.6-30.8% | 25.3-33.1% | 5.2-16.6% |
| without a diagnosis of Uf | 1.5-3.1%   | 0.1-0.8%  | 0.2-1.0%  | 1.2-%-2.4% | 1.4-2.2%   | 2.2-4.8%  | 3.8-4.8%   | 0.4-1.5%  |

\* Uf = uterine fibroids
